# Supplementary material for: Non-aqueous sol–gel synthesis of hybrid rare-earth-doped γ-Ga2O3nanoparticles with multiple organic–inorganic-ionic light-emission features
Source: Royal Society of Chemistry journal article supplement (doi:10.1039/c4tc02118e), 2014-10-28
Supplement: c4tc02118e1.pdf [file c4tc02118e1.pdf]

## ELECTRONIC SUPPLEMENTARY INFORMATION

# Non-aqueous sol-gel synthesis of hybrid rare-earth-doped $\gamma$ -Ga<sub>2</sub>O<sub>3</sub> nanoparticles with multiple organic-inorganic-ionic light-emission features

Roberto Lorenzi<sup>a\*</sup>, Alberto Paleari<sup>a,b</sup>, Nikita V. Golubev<sup>b</sup>, Elena S. Ignat'eva<sup>b</sup>, Vladimir N. Sigaev<sup>b</sup>, Markus Niederberger<sup>c</sup>,  
Alessandro Lauria<sup>c\*</sup>

<sup>a</sup>Department of Materials Science, University of Milano-Bicocca, via R. Cozzi 55, I-20125 Milano, Italy.  
E-mail: roberto.lorenzi@mater.unimib.it

<sup>b</sup>P.D. Sarkisov International Laboratory of Glass-Based Functional Materials, Mendeleyev University of Chemical Technology of Russia,  
Miusskaya Square 9, 125047 Moscow, Russia.

<sup>c</sup>Department of Materials, ETH Zürich, Vladimir-Prelog-Weg 5 - 8093 Zurich, Switzerland.  
E-mail: alessandro.lauria@mat.ethz.ch

### Materials & Methods:

All chemicals were purchased from Sigma-Aldrich (benzyl alcohol anhydrous 99.8%, gallium(III) acetylacetonate 99.99%) and ABCR (europium(III) acetate hydrate 99.99%) and used as received without further purification. Powder preparation were performed in a glove box with O<sub>2</sub> < 0.1 ppm and H<sub>2</sub>O < 0.1 ppm.

TEM measurements were made on a Philips FEI Tecnai F30 microscope operated at 300 kV on samples prepared by depositing onto carbon coated Cu grids 10  $\mu$ L of ethanol (Aldrich) suspension of washed NPs. X-ray diffraction (XRD) measurements were performed in reflection mode (Cu K $\alpha$  radiation at 45 kV and 40 mA) either on a X'Pert Pro diffractometer or on an Empyrean diffractometer (equipped with a high temperature chamber model HTK 1200 from Anton Paar), both from PANalytical (The Netherlands). Differential scanning calorimetry and thermogravimetry analysis were performed on a Netzsch DSC 449F3 thermoanalyzer; samples were prepared by placing nanopowders in Pt crucibles with a lid, and measured in Ar flux against empty Pt crucibles as a reference with a heating rate of 10 °C/min<sup>-1</sup>. Raman spectra were collected in backscattering configuration using an inVia Renishaw spectrometer and a 785 nm laser line as light source. Steady-state photoluminescence has been measured using a FP-8500 by Jasco. The data were corrected for the spectral response of the detection system and the spectral shape of the light source. Time-resolved photoluminescence has been carried out with a FLS 980 spectrofluorometer and using an EPLED by Edinburgh Photonics operating at 340 nm with pulse duration of about 900 ps as light source. Slow component of time-resolved (i.e. intrinsic lifetime of Eu ions) photoluminescence measurements were performed at RT using a Varian Eclipse spectrofluorometer and a pulsed Xenon lamp as light source.

### XRD patterns:

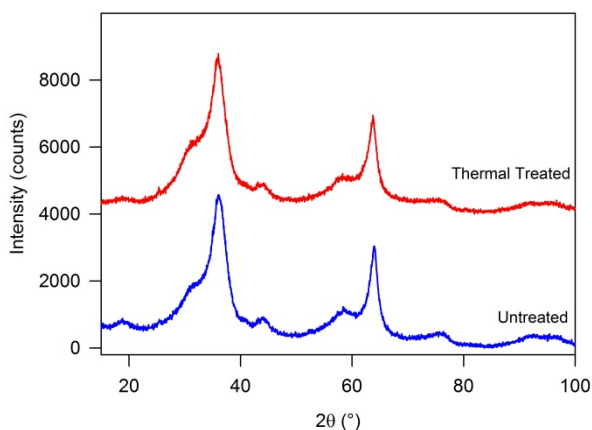

Fig. S1: XRD patterns of Ga<sub>2</sub>O<sub>3</sub> nanopowder before (blue line) and after (red line) thermal treatment at 420 °C for 1 h.

**Fitting results on lifetime measurements:**

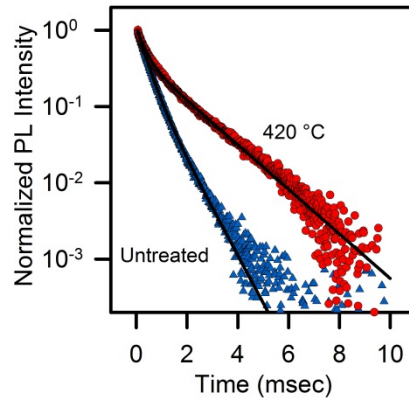

Fig. S2: lifetime measurements and relative fitting curves (black lines) of as-synthesized (blue triangles) and heat treated at 420 °C for 1 h (red circles) samples exciting at 290 nm and monitoring the luminescence at 620 nm.

|                  | a     | b     | $\tau_1$ ( $\mu$ s) | $\tau_2$ ( $\mu$ s) |
|------------------|-------|-------|---------------------|---------------------|
| Untreated sample | 0.810 | 0.346 | 320                 | 697                 |
| 420 °C, 1 h      | 0.615 | 0.463 | 312                 | 1160                |

Table S1: fitting results of lifetime measurements reported in Fig. S2, data have been fitted using the following biexponential formula:

$$f(t) = a \exp\left(-\frac{t}{\tau_1}\right) + b \exp\left(-\frac{t}{\tau_2}\right)$$
